# Supplementary material for: Electrospun carbon nanofibrous mats surface-decorated with Pd nanoparticles via the supercritical CO2 method for sensing of H2
Source: Royal Society of Chemistry journal article supplement (doi:10.1039/c2ra21338a), 2012-01-01
Supplement: c2ra21338a.pdf [file c2ra21338a.pdf]

## Electrospun carbon nanofibrous mats surface-decorated with Pd nanoparticles via the supercritical CO<sub>2</sub> method for sensing of H<sub>2</sub>

Yong Zhao, Xiaoxu Wang, Chuilin Lai, Guangfei He, Lifeng Zhang, Hao Fong and Zhengtao Zhu

*Department of Chemistry, South Dakota School of Mines and Technology, Rapid City, SD 57701*

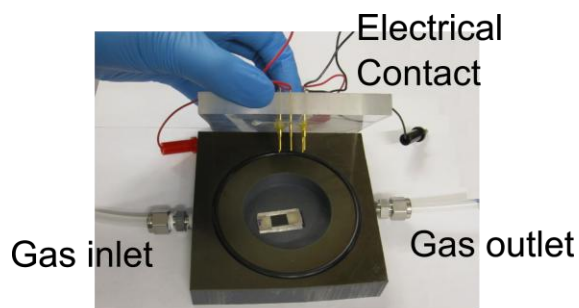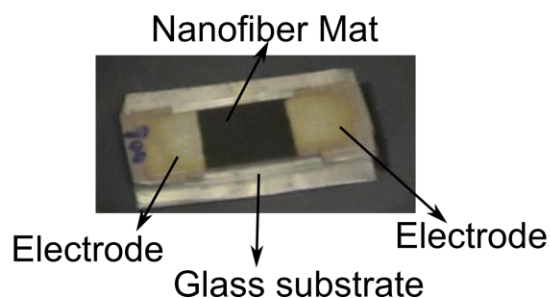

Figure S1: Images of the set-up for the sensing test.

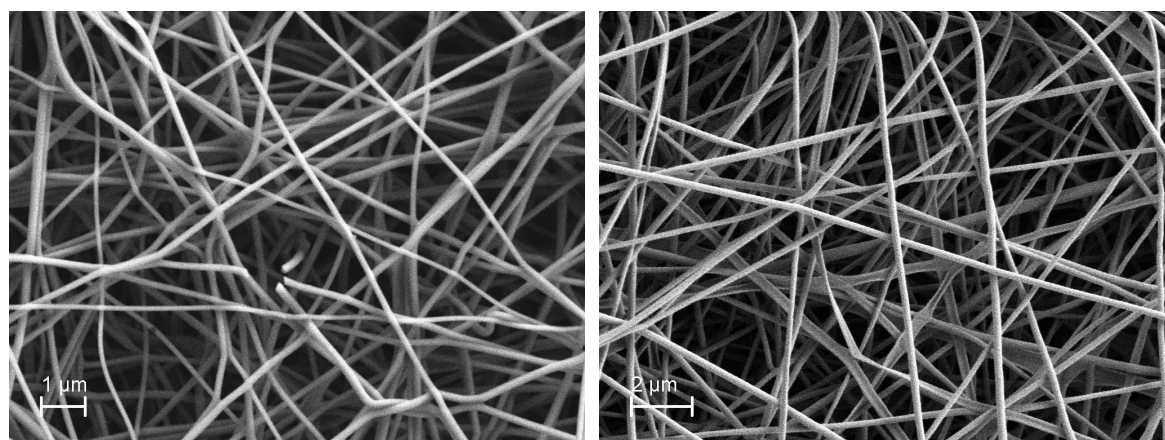

Figure S2: SEM images showing the representative morphologies of electrospun carbon nanofibrous mats prepared at the carbonization temperature of 700 °C (left) and 900 °C (right).
